# Supplementary material
Source: PubMed Central journal article supplement (PMC1964842)
Supplement: pnas_0700901104_2.pdf [file pnas_0700901104_2.pdf]

Table 1 . Information about PD patients and age-matched controls.

| Brain# | Diagnosis | Age (yrs) | Sex | PMI (hrs) | SN pathology         |
|--------|-----------|-----------|-----|-----------|----------------------|
| PD1    | PD        | 77        | M   | 30.5      | 4+pallor             |
| PD2    | PD        | 70        | M   | 13.58     | 4+pallor             |
| PD3    | PD        | 75        | M   | 14.9      | Diffuse lewy bodies  |
| PD4    | PD        | 75        | M   | 20        | pale, lewy bodies    |
| PD5    | PD        | 78        | F   | 4.25      | pale, lewy bodies    |
| PD6    | PD        | 79        | F   | 18.5      | 3-4+ pallor          |
| C1     | Control   | 70        | M   | 15.1      | normal               |
| C2     | Control   | 73        | M   | 30.25     | Moderately pigmented |
| C3     | Control   | 74        | M   | 14.33     | normal               |
| C4     | Control   | 75        | F   | 16.67     | normal               |
| C5     | Control   | 75        | M   | 20.5      | normal               |
| C6     | Control   | 78        | F   | 22.67     | normal               |
