# Supplementary material
Source: PubMed Central journal article supplement (PMC1964842)

**A**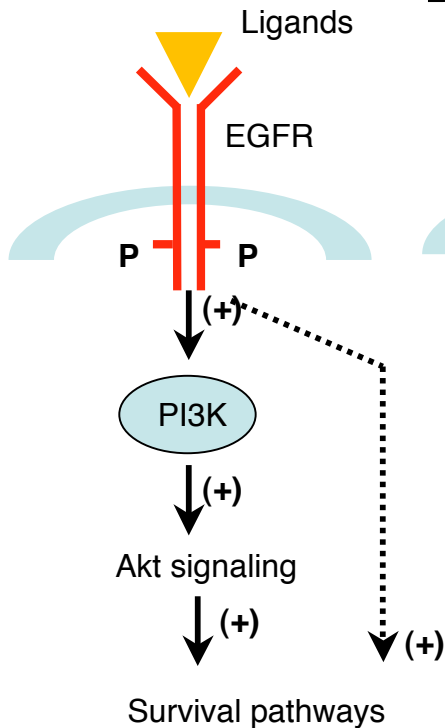**B**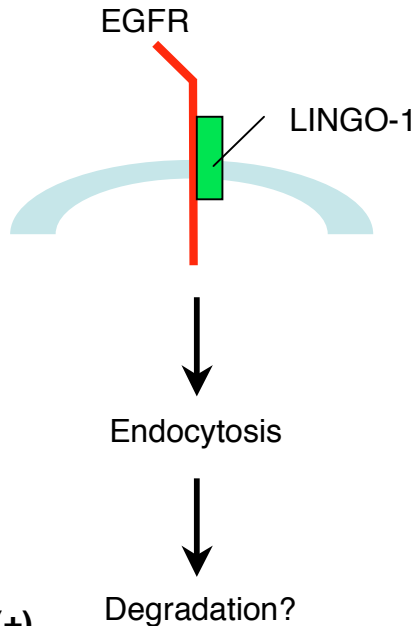**C**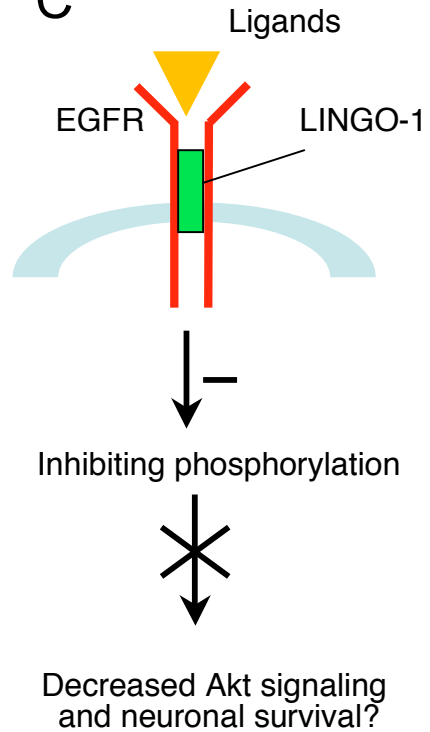

Supplement: pnas_0700901104_1.pdf [file pnas_0700901104_1.pdf]
